# Supplementary material for: Combined use of gap-PCR and next-generation sequencing improves thalassaemia carrier screening among premarital adults in China
Source: PubMed Central journal article supplement — J Clin Pathol. 2020 Jan 24;73(8):488–92. doi: 10.1136/jclinpath-2019-206339 (PMC7398480; doi:10.1136/jclinpath-2019-206339), 2020-01-24
Supplement: jclinpath-2019-206339supp001.pdf [file jclinpath-2019-206339supp001.pdf]

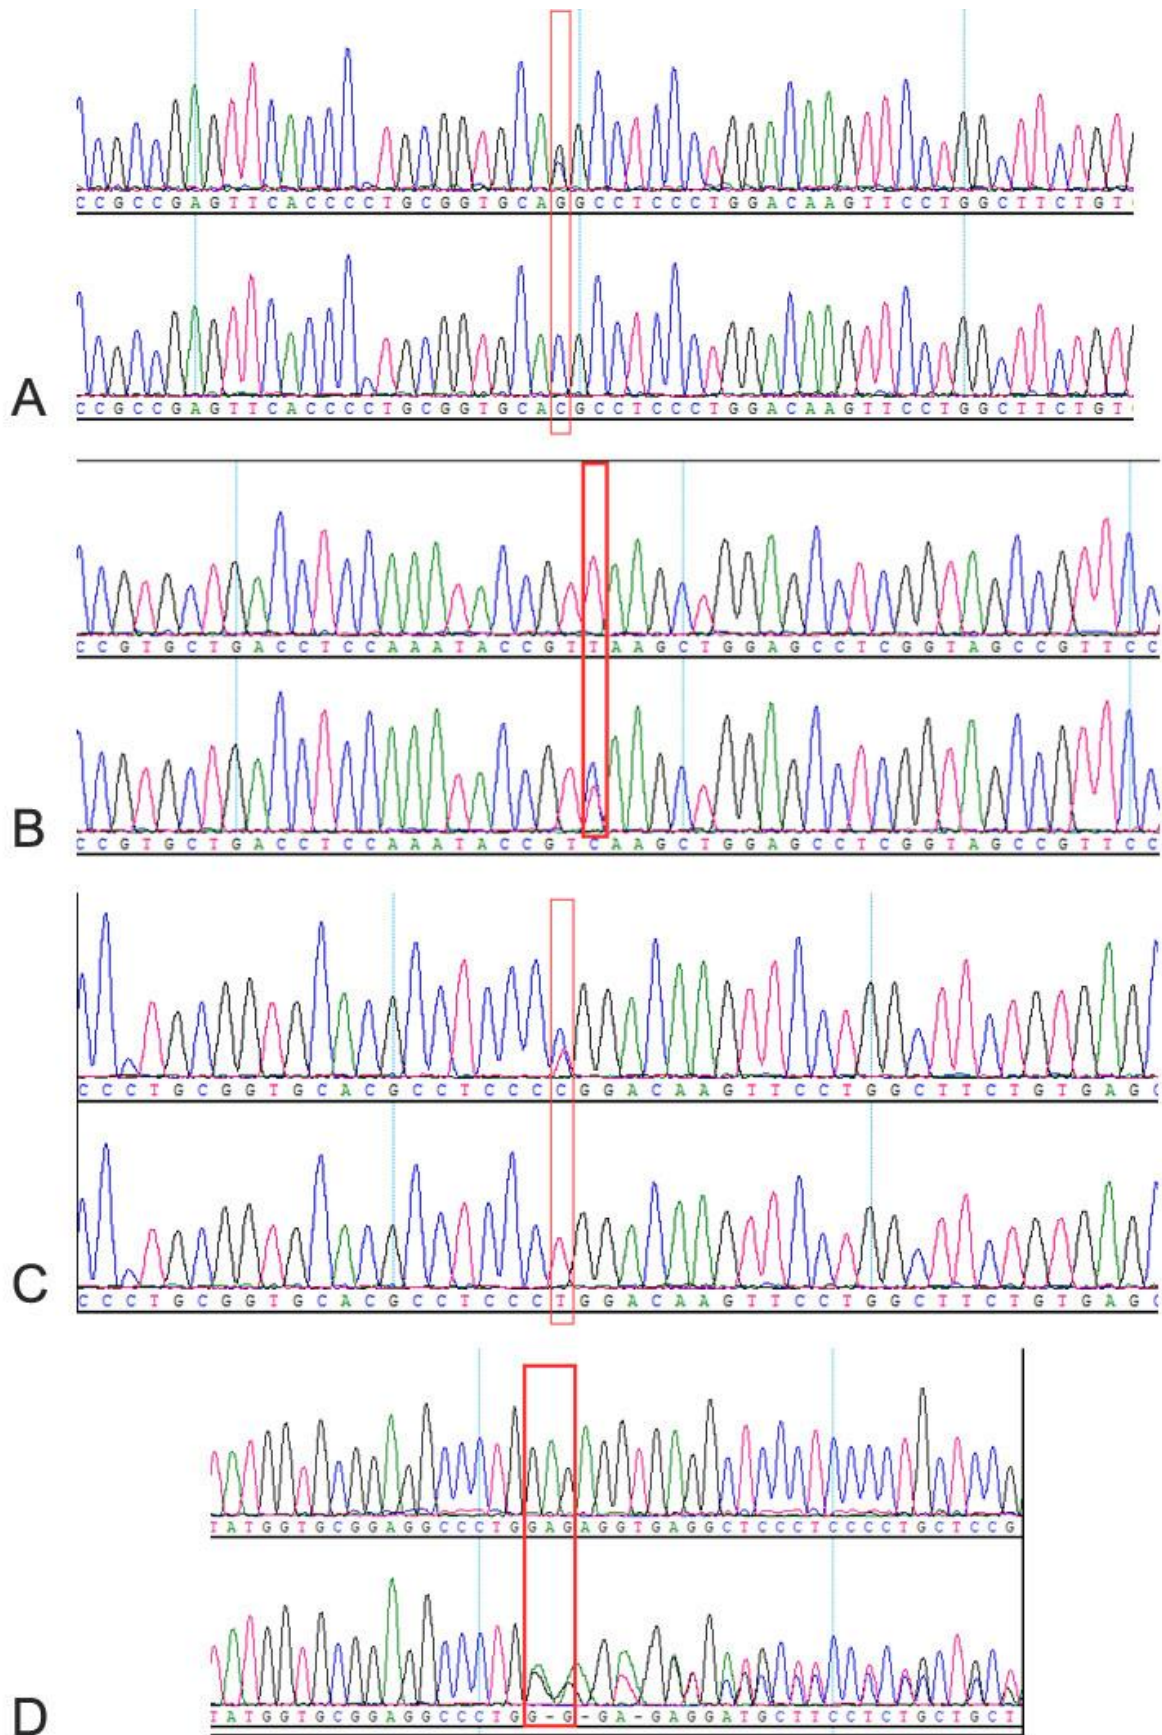

1

2 **Supplementary Figure1. Validation of NGS method for the  $\alpha$ -thalassemia mutations Hb Westmead (A),**

- 1 **Hb Constant Spring (B), Hb Quong Sze (C) and alpha2 Codon 30 del GAG (D). The wildtype (above)**
- 2 **and mutant (bottom) of each mutation were shown in the red rectangle.**

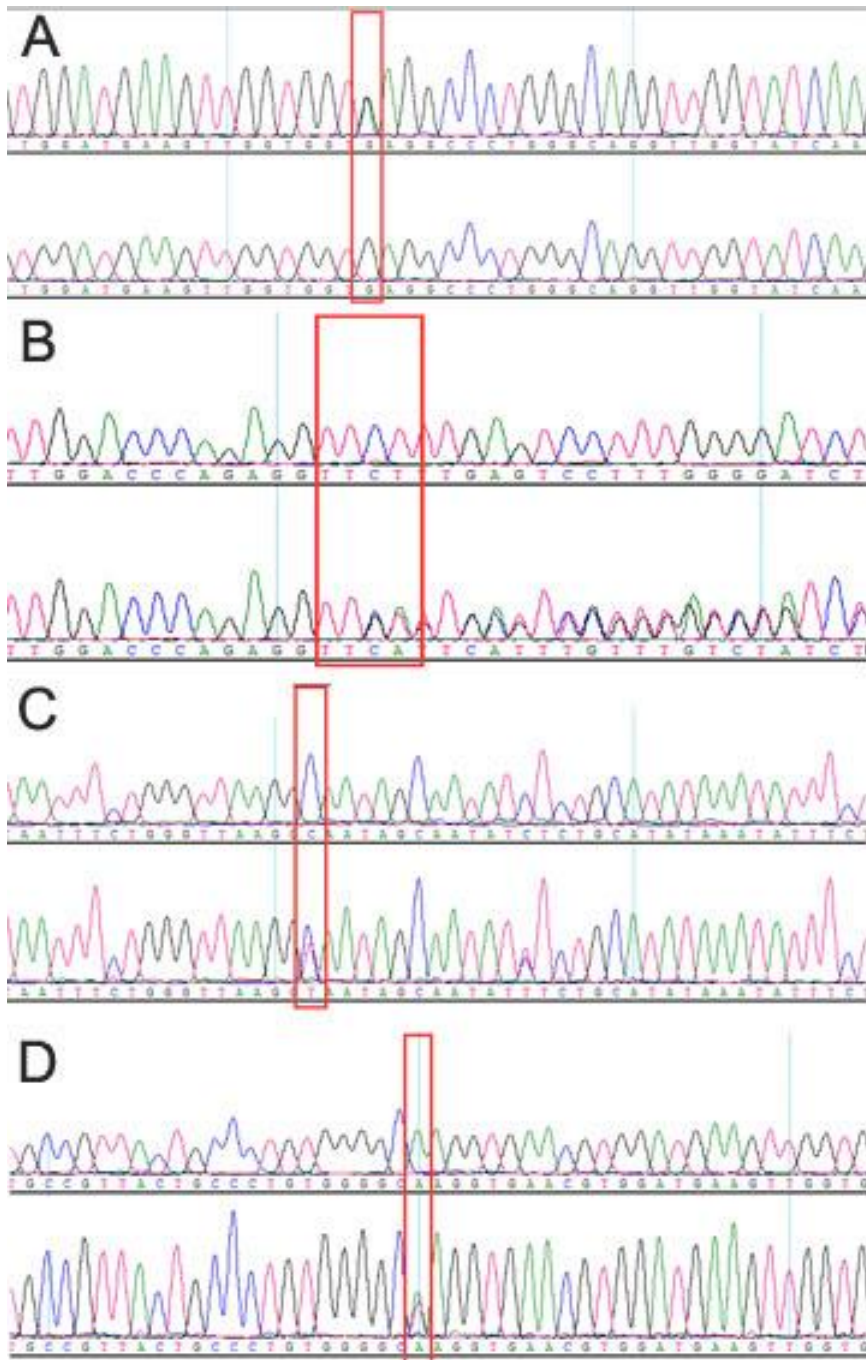

3

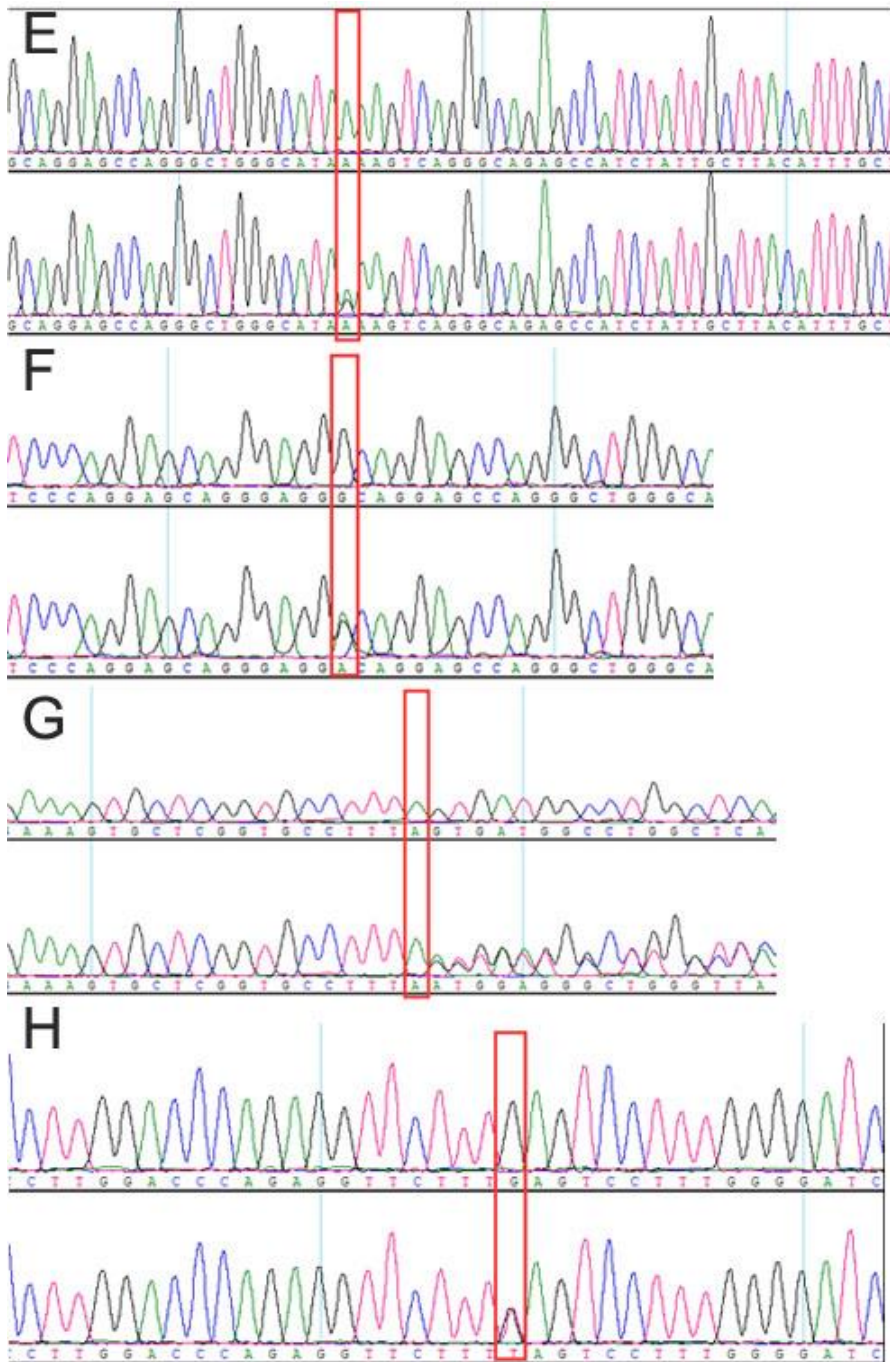

1

2 **Supplementary Figure2. Validation of NGS method for the  $\beta$ -thalassemia mutations Hb E(A), Codons**3 **41/42 (-TTCT) (B), IVS-II-654 (C>T) (C), Codon 17 (A>T) (D), -28 (A>G) (E), -50 (G>A) (F), Codons**4 **71/72 (+A) (G) and Codon 43 (G>T) (H). The wildtype (above) and mutant (bottom) of each mutation**5 **were shown in the red rectangle.**

6
