# Supplementary material for: Combined use of gap-PCR and next-generation sequencing improves thalassaemia carrier screening among premarital adults in China
Source: PubMed Central journal article supplement — J Clin Pathol. 2020 Jan 24;73(8):488–92. doi: 10.1136/jclinpath-2019-206339 (PMC7398480; doi:10.1136/jclinpath-2019-206339), 2020-01-24
Supplement: jclinpath-2019-206339supp002.pdf [file jclinpath-2019-206339supp002.pdf]

**Table S1. Comparison of thalassemia mutations detected by gap-PCR & NGS with routine genotyping tests (the gap-PCR & RDB method) in 152 individuals with thalassemia mutations.**

| Case ID | $\alpha$ _Gap-PCR           | $\beta$ _SNP(NGS)    | New variants (NGS)     | Routine genotyping test                            | HbA2 |
|---------|-----------------------------|----------------------|------------------------|----------------------------------------------------|------|
| Case1   | $\alpha\alpha/\alpha\alpha$ | IVS-II-654 (C>T)     | N                      | IVS-II-654 (C>T)                                   | 5.3  |
| Case2   | $\alpha\alpha/--SEA$        | N                    | N                      | $\alpha\alpha/--SEA$                               | 2.4  |
| Case3   | $\alpha\alpha/--SEA$        | N                    | N                      | $\alpha\alpha/--SEA$                               | 2.3  |
| Case4   | $\alpha\alpha/\alpha\alpha$ | Codons 41/42 (-TTCT) | N                      | Codons 41/42 (-TTCT)                               | 5.6  |
| Case5   | $\alpha\alpha/\alpha\alpha$ | -28 (A>G)            | HBA1:c.412A>G(Thr>Ala) | -28 (A>G)                                          | 5.2  |
| Case6   | $\alpha\alpha/-\alpha3.7$   | N                    | N                      | $\alpha\alpha/-\alpha3.7$                          | 2.4  |
| Case7   | $\alpha\alpha/-\alpha4.2$   | N                    | N                      | $\alpha\alpha/-\alpha4.2$                          | 2.3  |
| Case8   | $\alpha\alpha/-\alpha3.7$   | Codons 41/42 (-TTCT) | N                      | $\alpha\alpha/-\alpha3.7$ and Codons 41/42 (-TTCT) | 5.8  |
| Case9   | $\alpha\alpha/--SEA$        | N                    | N                      | $\alpha\alpha/--SEA$                               | 2.1  |
| Case10  | $\alpha\alpha/\alpha\alpha$ | -28 (A>G)            | N                      | -28 (A>G)                                          | 5.2  |
| Case11  | $\alpha\alpha/--SEA$        | N                    | N                      | $\alpha\alpha/--SEA$                               | 2.2  |
| Case12  | $\alpha\alpha/\alpha\alpha$ | Hb E                 | N                      | Hb E                                               | 3.5  |
| Case13  | $\alpha\alpha/\alpha\alpha$ | Codons 41/42 (-TTCT) | N                      | Codons 41/42 (-TTCT)                               | 5.4  |
| Case14  | $\alpha\alpha/--SEA$        | N                    | N                      | $\alpha\alpha/--SEA$                               | 2.3  |
| Case15  | $\alpha\alpha/\alpha\alpha$ | IVS-II-654 (C>T)     | N                      | IVS-II-654 (C>T)                                   | 4.9  |
| Case16  | $\alpha\alpha/\alpha\alpha$ | Codon 17 (A>T)       | N                      | Codon 17 (A>T)                                     | 6.1  |
| Case17  | $\alpha\alpha/--SEA$        | N                    | N                      | $\alpha\alpha/--SEA$                               | 2.4  |
| Case18  | $\alpha\alpha/--SEA$        | N                    | N                      | $\alpha\alpha/--SEA$                               | 2.3  |
| Case19  | $\alpha\alpha/\alpha\alpha$ | -28 (A>G)            | N                      | -28 (A>G)                                          | 5.4  |
| Case20  | $\alpha\alpha/\alpha\alpha$ | Codons 41/42 (-TTCT) | N                      | Codons 41/42 (-TTCT)                               | 5.4  |
| Case21  | $\alpha\alpha/--SEA$        | N                    | N                      | $\alpha\alpha/--SEA$                               | 2.1  |
| Case22  | $\alpha\alpha/--SEA$        | N                    | N                      | $\alpha\alpha/--SEA$                               | 1.8  |

|        |                             |                      |   |                                               |     |
|--------|-----------------------------|----------------------|---|-----------------------------------------------|-----|
| Case23 | $\alpha\alpha/\alpha\alpha$ | Codons 41/42 (-TTCT) | N | Codons 41/42 (-TTCT)                          | 5.7 |
| Case24 | $\alpha\alpha/--SEA$        | N                    | N | $\alpha\alpha/--SEA$                          | 2.1 |
| Case25 | $\alpha\alpha/-\alpha3.7$   | N                    | N | Hb Constant Spring (Hb CS)                    | 1.7 |
| Case26 | $\alpha\alpha/--SEA$        | N                    | N | $\alpha\alpha/--SEA$                          | 2.2 |
| Case27 | $\alpha\alpha/\alpha\alpha$ | Codon 17 (A>T)       | N | Codon 17 (A>T)                                | 5.5 |
| Case28 | $\alpha\alpha/--SEA$        | N                    | N | $\alpha\alpha/--SEA$                          | 2.1 |
| Case29 | $\alpha\alpha/--SEA$        | N                    | N | $\alpha\alpha/--SEA$                          | 2.3 |
| Case30 | $\alpha\alpha/--SEA$        | Codons 41/42 (-TTCT) | N | $\alpha\alpha/--SEA$ and Codons 41/42 (-TTCT) |     |
| Case31 | $\alpha\alpha/--SEA$        | N                    | N | $\alpha\alpha/--SEA$                          | 2.4 |
| Case32 | $\alpha\alpha/--SEA$        | N                    | N | $\alpha\alpha/--SEA$                          | 2   |
| Case33 | $-\alpha4.2/--SEA$          | N                    | N | $-\alpha4.2/--SEA$                            | 1.3 |
| Case34 | $\alpha\alpha/\alpha\alpha$ | IVS-II-654 (C>T)     | N | IVS-II-654 (C>T)                              | 5.1 |
| Case35 | $\alpha\alpha/-\alpha4.2$   | N                    | N | $\alpha\alpha/-\alpha4.2$                     | 2.4 |
| Case36 | $\alpha\alpha/--SEA$        | N                    | N | $\alpha\alpha/--SEA$                          | 2.4 |
| Case37 | $\alpha\alpha/--SEA$        | N                    | N | $\alpha\alpha/--SEA$                          | 2.1 |
| Case38 | $\alpha\alpha/--SEA$        | N                    | N | $\alpha\alpha/--SEA$                          | 2.3 |
| Case39 | $\alpha\alpha/--SEA$        | N                    | N | $\alpha\alpha/--SEA$                          | 2.4 |
| Case40 | $\alpha\alpha/--SEA$        | N                    | N | $\alpha\alpha/--SEA$                          | 2.2 |
| Case41 | $\alpha\alpha/--SEA$        | N                    | N | $\alpha\alpha/--SEA$                          | 2.2 |
| Case42 | $\alpha\alpha/\alpha\alpha$ | Codon 43 (G>T)       | N | Codon 43 (G>T)                                | 4.9 |
| Case43 | $\alpha\alpha/--SEA$        | N                    | N | $\alpha\alpha/--SEA$                          | 2.1 |
| Case44 | $\alpha\alpha/-\alpha3.7$   | N                    | N | $\alpha\alpha/-\alpha3.7$                     | 2.3 |
| Case45 | $\alpha\alpha/\alpha\alpha$ | Codons 41/42 (-TTCT) | N | 41-42/N                                       | 5.7 |
| Case46 | $\alpha\alpha/\alpha\alpha$ | -28 (A>G)            | N | -28 (A>G)                                     | 5.4 |
| Case47 | $\alpha\alpha/--SEA$        | N                    | N | $\alpha\alpha/--SEA$                          | 2.1 |
| Case48 | $\alpha\alpha/\alpha\alpha$ | Codon 17 (A>T)       | N | Codon 17 (A>T)                                | 5.5 |

|        |                             |                      |               |                                   |     |
|--------|-----------------------------|----------------------|---------------|-----------------------------------|-----|
| Case49 | $\alpha\alpha/--SEA$        | N                    | N             | $\alpha\alpha/--SEA$              | 2.4 |
| Case50 | $\alpha\alpha/-\alpha3.7$   | N                    | N             | $\alpha\alpha/-\alpha3.7$         | 2.3 |
| Case51 | $\alpha\alpha/\alpha\alpha$ | Codons 41/42 (-TTCT) | N             | Codons 41/42 (-TTCT)              | 5.5 |
| Case52 | $\alpha\alpha/\alpha\alpha$ | Codons 71/72 (+A)    | N             | Hb Westmead and Codons 71/72 (+A) | 5.6 |
| Case53 | $\alpha\alpha/\alpha\alpha$ | Codons 41/42 (-TTCT) | N             | Codons 41/42 (-TTCT)              | 5.5 |
| Case54 | $\alpha\alpha/--SEA$        | N                    | N             | $\alpha\alpha/--SEA$              | 2.2 |
| Case55 | $\alpha\alpha/--SEA$        | N                    | N             | $\alpha\alpha/--SEA$              | 2.2 |
| Case56 | $-\alpha3.7/--SEA$          | N                    | N             | $-\alpha3.7/--SEA$                | 1.1 |
| Case57 | $\alpha\alpha/--SEA$        | N                    | N             | $\alpha\alpha/--SEA$              | 2.1 |
| Case58 | $\alpha\alpha/-\alpha3.7$   | N                    | N             | $\alpha\alpha/-\alpha3.7$         | 2.4 |
| Case59 | $\alpha\alpha/\alpha\alpha$ | Codon 17 (A>T)       | N             | Codon 17 (A>T)                    | 5.8 |
| Case60 | $\alpha\alpha/\alpha\alpha$ | Hb E                 | N             | Hb E                              | 3.6 |
| Case61 | $\alpha\alpha/\alpha\alpha$ | -28 (A>G)            | N             | -28 (A>G)                         | 6   |
| Case62 | $\alpha\alpha/--SEA$        | N                    | N             | $\alpha\alpha/--SEA$              | 2.1 |
| Case63 | $\alpha\alpha/\alpha\alpha$ | Hb E                 | N             | Hb E                              | 3.8 |
| Case64 | $\alpha\alpha/--SEA$        | N                    | N             | $\alpha\alpha/--SEA$              | 2.3 |
| Case65 | $\alpha\alpha/\alpha\alpha$ | Codons 71/72 (+A)    | N             | Codons 71/72 (+A)                 | 5.9 |
| Case66 | $\alpha\alpha/--SEA$        | N                    | N             | $\alpha\alpha/--SEA$              | 2.2 |
| Case67 | $\alpha\alpha/\alpha\alpha$ | Codons 41/42 (-TTCT) | N             | Codons 41/42 (-TTCT)              | 5.7 |
| Case68 | $\alpha\alpha/--SEA$        | N                    | N             | $\alpha\alpha/--SEA$              | 2.4 |
| Case69 | $\alpha\alpha/\alpha\alpha$ | N                    | Hb Hekinan II | Hb Westmead                       | 1.8 |
| Case70 | $\alpha\alpha/--SEA$        | N                    | N             | $\alpha\alpha/--SEA$              | 2.2 |
| Case71 | $\alpha\alpha/--SEA$        | N                    | N             | $\alpha\alpha/--SEA$              | 2.2 |
| Case72 | $\alpha\alpha/--SEA$        | N                    | N             | $\alpha\alpha/--SEA$              | 2.4 |
| Case73 | $\alpha\alpha/--SEA$        | N                    | N             | $\alpha\alpha/--SEA$              | 2.4 |
| Case74 | $\alpha\alpha/--SEA$        | N                    | N             | $\alpha\alpha/--SEA$              | 2.4 |

|         |                             |                      |                       |                            |     |
|---------|-----------------------------|----------------------|-----------------------|----------------------------|-----|
| Case75  | $\alpha\alpha/--SEA$        | N                    | N                     | $\alpha\alpha/--SEA$       | 2.4 |
| Case76  | $\alpha\alpha/\alpha\alpha$ | IVS-II-654 (C>T)     | N                     | IVS-II-654 (C>T)           | 5   |
| Case77  | $\alpha\alpha/\alpha\alpha$ | Codons 41/42 (-TTCT) | N                     | Codons 41/42 (-TTCT)       | 6.4 |
| Case78  | $\alpha\alpha/--SEA$        | N                    | N                     | $\alpha\alpha/--SEA$       | 2.3 |
| Case79  | $\alpha\alpha/\alpha\alpha$ | Codons 41/42 (-TTCT) | N                     | Codons 41/42 (-TTCT)       | 5.4 |
| Case80  | $\alpha\alpha/--SEA$        | N                    | N                     | $\alpha\alpha/--SEA$       | 1.7 |
| Case81  | $\alpha\alpha/\alpha\alpha$ | IVS-II-654 (C>T)     | N                     | IVS-II-654 (C>T)           | 5.2 |
| Case82  | $\alpha\alpha/\alpha\alpha$ | Codon 43 (G>T)       | N                     | Codon 43 (G>T)             | 5.5 |
| Case83  | $\alpha\alpha/\alpha\alpha$ | Codon 17 (A>T)       | N                     | Codon 17 (A>T)             | 5.7 |
| Case84  | $\alpha\alpha/--SEA$        | N                    | N                     | $\alpha\alpha/--SEA$       | 2.2 |
| Case85  | $\alpha\alpha/\alpha\alpha$ | IVS-II-654 (C>T)     | Hb New York           | IVS-II-654 (C>T)           | 4.6 |
| Case86  | $\alpha\alpha/--SEA$        | N                    | N                     | $\alpha\alpha/--SEA$       | 1.1 |
| Case87  | $\alpha\alpha/--SEA$        | N                    | N                     | $\alpha\alpha/--SEA$       | 2   |
| Case88  | $\alpha\alpha/--SEA$        | N                    | N                     | $\alpha\alpha/--SEA$       | 2.2 |
| Case89  | $\alpha\alpha/--SEA$        | N                    | N                     | $\alpha\alpha/--SEA$       | 2.4 |
| Case90  | $\alpha\alpha/--SEA$        | N                    | N                     | $\alpha\alpha/--SEA$       | 2.2 |
| Case91  | $\alpha\alpha/--SEA$        | N                    | N                     | $\alpha\alpha/--SEA$       | 2.4 |
| Case92  | $\alpha\alpha/\alpha\alpha$ | Codons 41/42 (-TTCT) | N                     | Codons 41/42 (-TTCT)       | 4.8 |
| Case93  | $\alpha\alpha/\alpha\alpha$ | Codons 41/42 (-TTCT) | N                     | Codons 41/42 (-TTCT)       | 5.5 |
| Case94  | $\alpha\alpha/\alpha\alpha$ | Codons 41/42 (-TTCT) | HBB:c.*+5G>A          | Codons 41/42 (-TTCT)       | 5.6 |
| Case95  | $\alpha\alpha/-\alpha 3.7$  | N                    | N                     | $\alpha\alpha/-\alpha 3.7$ | 2.4 |
| Case96  | $\alpha\alpha/\alpha\alpha$ | Codons 41/42 (-TTCT) | N                     | Codons 41/42 (-TTCT)       | 5.7 |
| Case97  | $\alpha\alpha/\alpha\alpha$ | IVS-II-654 (C>T)     | N                     | IVS-II-654 (C>T)           | 4.8 |
| Case98  | $\alpha\alpha/--SEA$        | N                    | N                     | $\alpha\alpha/--SEA$       | 2.2 |
| Case99  | $\alpha\alpha/--SEA$        | N                    | N                     | $\alpha\alpha/--SEA$       | 2.1 |
| Case100 | $\alpha\alpha/\alpha\alpha$ | IVS-II-654 (C>T)     | HBA2:c.46G>A(Gly>Ser) | IVS-II-654 (C>T)           | 5.5 |

|         |                             |                      |               |                                     |     |
|---------|-----------------------------|----------------------|---------------|-------------------------------------|-----|
| Case101 | $\alpha\alpha/--SEA$        | N                    | N             | $\alpha\alpha/--SEA$                | 2.2 |
| Case102 | $\alpha\alpha/--SEA$        | N                    | N             | $\alpha\alpha/--SEA$                | 2.4 |
| Case103 | $\alpha\alpha/--SEA$        | N                    | N             | $\alpha\alpha/--SEA$                | 2.1 |
| Case104 | $\alpha\alpha/\alpha\alpha$ | IVS-II-654 (C>T)     | N             | IVS-II-654 (C>T)                    | 4.8 |
| Case105 | $\alpha\alpha/\alpha\alpha$ | Codons 41/42 (-TTCT) | HBB:c.-180G>C | Codons 41/42 (-TTCT)                | 4.9 |
| Case106 | $\alpha\alpha/--SEA$        | N                    | N             | $\alpha\alpha/--SEA$                | 2.3 |
| Case107 | $\alpha\alpha/--SEA$        | N                    | N             | $\alpha\alpha/--SEA$                | 2.3 |
| Case108 | $\alpha\alpha/-\alpha 4.2$  | N                    | Hb G-Honolulu | $\alpha\alpha/-\alpha 4.2$          | 1.7 |
| Case109 | $\alpha\alpha/\alpha\alpha$ | Codons 41/42 (-TTCT) | N             | Codons 41/42 (-TTCT)                | 5.2 |
| Case110 | $\alpha\alpha/\alpha\alpha$ | IVS-II-654 (C>T)     | N             | IVS-II-654 (C>T)                    | 5   |
| Case111 | $\alpha\alpha/\alpha\alpha$ | Codons 41/42 (-TTCT) | N             | Codons 41/42 (-TTCT)                | 5.6 |
| Case112 | $\alpha\alpha/\alpha\alpha$ | N                    | N             | Hb Quong Sze                        | 1.8 |
| Case113 | $\alpha\alpha/--SEA$        | N                    | N             | $\alpha\alpha/--SEA$                | 2.3 |
| Case114 | $\alpha\alpha/\alpha\alpha$ | -28 (A>G)            | N             | -28 (A>G)                           | 5.7 |
| Case115 | $\alpha\alpha/--SEA$        | N                    | N             | $\alpha\alpha/--SEA$                | 2.3 |
| Case116 | $\alpha\alpha/-\alpha 3.7$  | N                    | N             | $\alpha\alpha/-\alpha 3.7$          | 2.4 |
| Case117 | $\alpha\alpha/\alpha\alpha$ | Codons 41/42 (-TTCT) | N             | Codons 41/42 (-TTCT)                | 5.9 |
| Case118 | $\alpha\alpha/--SEA$        | N                    | N             | $\alpha\alpha/--SEA$                | 2.1 |
| Case119 | $\alpha\alpha/\alpha\alpha$ | Codons 41/42 (-TTCT) | N             | Codons 41/42 (-TTCT)                | 6.4 |
| Case120 | $\alpha\alpha/-\alpha 3.7$  | Hb E                 | N             | $\alpha\alpha/-\alpha 3.7$ and Hb E | 3.7 |
| Case121 | $\alpha\alpha/--SEA$        | N                    | N             | $\alpha\alpha/--SEA$                | 2.4 |
| Case122 | $\alpha\alpha/--SEA$        | N                    | N             | $\alpha\alpha/--SEA$                | 2.4 |
| Case123 | $\alpha\alpha/\alpha\alpha$ | Codon 17 (A>T)       | N             | Codon 17 (A>T)                      | 5.2 |
| Case124 | $-\alpha 3.7/--SEA$         | N                    | N             | $-\alpha 3.7/--SEA$                 | 1.2 |
| Case125 | $\alpha\alpha/\alpha\alpha$ | Codons 41/42 (-TTCT) | N             | Codons 41/42 (-TTCT)                | 5.4 |
| Case126 | $\alpha\alpha/--SEA$        | N                    | N             | $\alpha\alpha/--SEA$                | 2.2 |

|         |                               |                      |   |                                                        |     |
|---------|-------------------------------|----------------------|---|--------------------------------------------------------|-----|
| Case127 | $\alpha\alpha$ - $\alpha$ 3.7 | N                    | N | $\alpha\alpha$ - $\alpha$ 3.7                          | 2.1 |
| Case128 | $\alpha\alpha/\alpha\alpha$   | N                    | N | $\alpha\alpha$ CS/ $\alpha\alpha$                      | 2.1 |
| Case129 | $\alpha\alpha/\alpha\alpha$   | Codons 71/72 (+A)    | N | Codons 71/72 (+A)                                      | 5.3 |
| Case130 | $\alpha\alpha$ - $\alpha$ 4.2 | N                    | N | $\alpha\alpha$ - $\alpha$ 4.2                          | 2.4 |
| Case131 | $\alpha\alpha$ --SEA          | N                    | N | $\alpha\alpha$ --SEA                                   | 2.4 |
| Case132 | $\alpha\alpha/\alpha\alpha$   | Codons 41/42 (-TTCT) | N | Codons 41/42 (-TTCT)                                   | 5.9 |
| Case133 | $\alpha\alpha/\alpha\alpha$   | Codons 41/42 (-TTCT) | N | 41-42/N                                                | 5.5 |
| Case134 | $\alpha\alpha$ --SEA          | N                    | N | $\alpha\alpha$ --SEA                                   | 2.4 |
| Case135 | $\alpha\alpha/\alpha\alpha$   | IVS-II-654 (C>T)     | N | IVS-II-654 (C>T)                                       | 5.1 |
| Case136 | $\alpha\alpha/\alpha\alpha$   | IVS-II-654 (C>T)     | N | IVS-II-654 (C>T)                                       | 4.7 |
| Case137 | $\alpha\alpha$ --SEA          | N                    | N | $\alpha\alpha$ --SEA                                   | 2.2 |
| Case138 | $\alpha\alpha$ --SEA          | N                    | N | $\alpha\alpha$ --SEA                                   | 2.3 |
| Case139 | $\alpha\alpha$ --SEA          | N                    | N | $\alpha\alpha$ --SEA                                   | 2.4 |
| Case140 | $\alpha\alpha$ --SEA          | N                    | N | $\alpha\alpha$ --SEA                                   | 2.3 |
| Case141 | $\alpha\alpha$ - $\alpha$ 3.7 | N                    | N | $\alpha\alpha$ - $\alpha$ 3.7                          | 2.4 |
| Case142 | $\alpha\alpha$ --SEA          | N                    | N | $\alpha\alpha$ --SEA                                   | 2.4 |
| Case143 | $\alpha\alpha/\alpha\alpha$   | -28 (A>G)            | N | (-28/N)                                                | 5.9 |
| Case144 | $\alpha\alpha$ - $\alpha$ 4.2 | N                    | N | $\alpha\alpha$ - $\alpha$ 4.2                          | 2.3 |
| Case145 | $\alpha\alpha$ - $\alpha$ 4.2 | IVS-II-654 (C>T)     | N | $\alpha\alpha$ - $\alpha$ 4.2 and IVS-II-654 (C>T)     | 5.2 |
| Case146 | $\alpha\alpha/\alpha\alpha$   | Codons 41/42 (-TTCT) | N | Codons 41/42 (-TTCT)                                   | 5.3 |
| Case147 | $\alpha\alpha/\alpha\alpha$   | IVS-II-654 (C>T)     | N | IVS-II-654 (C>T)                                       | 5.1 |
| Case148 | $\alpha\alpha$ - $\alpha$ 3.7 | Codons 41/42 (-TTCT) | N | $\alpha\alpha$ - $\alpha$ 3.7 and Codons 41/42 (-TTCT) | 5.9 |
| Case149 | $\alpha\alpha/\alpha\alpha$   | Codons 41/42 (-TTCT) | N | Codons 41/42 (-TTCT)                                   | 5.5 |
| Case150 | $\alpha\alpha/\alpha\alpha$   | Codons 41/42 (-TTCT) | N | Codons 41/42 (-TTCT)                                   | 5.5 |
| Case151 | $\alpha\alpha$ --SEA          | N                    | N | $\alpha\alpha$ --SEA                                   | 2.3 |
| Case152 | $\alpha\alpha/\alpha\alpha$   | Codon 17 (A>T)       | N | Codon 17 (A>T)                                         | 6.3 |

**Table S2. Genotypes and constituent ratio of  $\alpha$ -thalassemia carriers**

| <b>HBA mutation</b>                                                    | <b>cases</b> | <b>constituent ratio (%)</b> |
|------------------------------------------------------------------------|--------------|------------------------------|
| -- <sup>SEA</sup> $\alpha$ / $\alpha\alpha$                            | 92           | 44.4                         |
| - $\alpha^{3.7}$ / $\alpha\alpha$                                      | 53           | 25.6                         |
| $\alpha^{WS}$ $\alpha$ / $\alpha\alpha$                                | 20           | 9.7                          |
| - $\alpha^{4.2}$ / $\alpha\alpha$                                      | 15           | 7.2                          |
| $\alpha^{CS}$ $\alpha$ / $\alpha\alpha$                                | 7            | 3.4                          |
| $\alpha^{QS}$ $\alpha$ / $\alpha\alpha$                                | 4            | 1.9                          |
| Hb Hekinan II/ $\alpha\alpha$                                          | 2            | 1.0                          |
| -- <sup>SEA</sup> / $\alpha^{3.7}$                                     | 2            | 1.0                          |
| $\alpha$ HBA2: c.46G>A/ $\alpha\alpha$                                 | 1            | 0.5                          |
| Hb Owari/ $\alpha\alpha$                                               | 1            | 0.5                          |
| Alpha2 Codon 30 del GAG/ $\alpha\alpha$                                | 1            | 0.5                          |
| -- <sup>SEA</sup> / $\alpha^{4.2}$                                     | 1            | 0.5                          |
| - $\alpha^{3.7}$ / $\alpha^{4.2}$                                      | 1            | 0.5                          |
| Hb G-Honolulu/Hb G-Honolulu                                            | 1            | 0.5                          |
| HBA2: c.190G>A/ $\alpha\alpha$                                         | 1            | 0.5                          |
| $\alpha^{WS}$ $\alpha$ /Hb Hekinan II                                  | 1            | 0.5                          |
| - $\alpha^{4.2}$ / $\alpha^{Hb\ G-Honolulu}$ $\alpha^{Hb\ G-Honolulu}$ | 1            | 0.5                          |
| - $\alpha^{4.2}$ /Hb Owari                                             | 1            | 0.5                          |
| - $\alpha^{3.7}$ / $\alpha^{WS}$ $\alpha^{WS}$                         | 1            | 0.5                          |
| - $\alpha^{3.7}$ / $\alpha^{CS}$ $\alpha^{CS}$                         | 1            | 0.5                          |
| Total                                                                  | 207          | 100                          |

**Table S3. Genotypes and constituent ratio of  $\beta$ -thalassemia carriers**

| <b>HBB mutation</b>                  | <b>cases</b> | <b>constituent ratio (%)</b> |
|--------------------------------------|--------------|------------------------------|
| Codons 41/42 (-TTCT)/ $\beta^A$      | 24           | 34.3                         |
| IVS-II-654 (C>T)/ $\beta^A$          | 11           | 15.7                         |
| Codon 17 (A>T)/ $\beta^A$            | 8            | 11.4                         |
| -28 (A>G)/ $\beta^A$                 | 6            | 8.6                          |
| -50 (G>A)/ $\beta^A$                 | 5            | 7.1                          |
| Hb E/ $\beta^A$                      | 3            | 4.3                          |
| HBB: c.*+129T>A/ $\beta^A$           | 3            | 4.3                          |
| Codons 71/72 (+A)/ $\beta^A$         | 2            | 2.9                          |
| Codon 43 (G>T)/ $\beta^A$            | 2            | 2.9                          |
| HBB: c.-64G>C/ $\beta^A$             | 2            | 2.9                          |
| HBB: c.-180 G>C/Codons 41/42 (-TTCT) | 1            | 1.4                          |
| HBB: c.*+5G>A/Codons 41/42 (-TTCT)   | 1            | 1.4                          |
| Hb New York/IVS-II-654 (C>T)         | 1            | 1.4                          |
| HBB: c.-113A>G/ $\beta^A$            | 1            | 1.4                          |
| Total                                | 70           | 100                          |



**Table S4. Genotypes and constituent ratio of 8 carriers of composite  $\alpha$ - and  $\beta$ -thalassemia mutations**

| <b>HBA mutation</b>            | <b>HBB mutation</b>             | <b>cases</b> | <b>constituent ratio (%)</b> |
|--------------------------------|---------------------------------|--------------|------------------------------|
| $-\alpha^{3.7}/\alpha\alpha$   | Codons 41/42 (-TTCT)/ $\beta^A$ | 2            | 25.0                         |
| $--^{SEA}/\alpha\alpha$        | Codons 41/42 (-TTCT)/ $\beta^A$ | 1            | 12.5                         |
| $-\alpha^{3.7}/\alpha\alpha$   | Hb E/ $\beta^A$                 | 1            | 12.5                         |
| $-\alpha^{4.2}/\alpha\alpha$   | IVS-II-654 (C>T)/ $\beta^A$     | 1            | 12.5                         |
| $\alpha^{WS}/\alpha\alpha$     | Codons 71/72 (+A)/ $\beta^A$    | 1            | 12.5                         |
| HBA2: c.46G>A/ $\alpha\alpha$  | IVS-II-654 (C>T)/ $\beta^A$     | 1            | 12.5                         |
| HBA1: c.412A>G/ $\alpha\alpha$ | -28 (A>G)/ $\beta^A$            | 1            | 12.5                         |
| Total                          | -                               | 8            | 100                          |

**Table S5. Sensitivity and specificity of MM for thalassemia carriers screened by NGS**

| <b>MM</b>                         | <b>Sensitivity</b><br>(%95 CI) | <b>Specificity</b><br>(%95 CI) | <b>PPV</b><br>(%95 CI)     | <b>NPV</b><br>(%95 CI)      | <b>True positive</b> | <b>False positive</b> | <b>True negative</b> | <b>False negative</b> |
|-----------------------------------|--------------------------------|--------------------------------|----------------------------|-----------------------------|----------------------|-----------------------|----------------------|-----------------------|
| $\alpha$ -thalassemia             | 73.49%<br>(67.06%- 79.26%)     | 89.12%<br>(87.53%- 90.57%)     | 46.47%<br>(42.55%- 50.44%) | 96.32%<br>(95.44%- 97.03%)  | 158                  | 182                   | 1491                 | 57                    |
| $\alpha$ $\alpha$ /--SEA          | 97.85%<br>(92.45%- 99.74%)     | 86.13 %<br>(84.44%- 87.69%)    | 26.76%<br>(24.49%- 29.16%) | 99.87 %<br>(99.49%- 99.97%) | 91                   | 249                   | 1546                 | 2                     |
| $\alpha$ $\alpha$ /- $\alpha$ 3.7 | 55.17%<br>(41.54%- 68.26%)     | 82.20 %<br>(80.31%- 83.97%)    | 9.41%<br>(7.46%- 11.80%)   | 98.20 %<br>(97.62%- 98.65%) | 32                   | 308                   | 1422                 | 26                    |
| $\alpha$ $\alpha$ /- $\alpha$ 4.2 | 83.33%<br>(58.58%- 96.42%)     | 82.62%<br>(80.83%- 84.31%)     | 4.41%<br>(3.54%- 5.48%)    | 99.81 %<br>(99.46%- 99.93%) | 15                   | 325                   | 1545                 | 3                     |
| $\beta$ -thalassemia              | 85.90%<br>(76.17%- 92.74%)     | 84.92 %<br>(83.18%- 86.54%)    | 19.71%<br>(17.56%- 22.04%) | 99.29 %<br>(98.78%- 99.59%) | 67                   | 273                   | 1537                 | 11                    |
| Codons 41/42 (-TTCT)              | 96.55%<br>(82.24%- 99.91%)     | 83.22%<br>(81.44%- 84.89%)     | 8.24%<br>(7.36%- 9.21%)    | 99.94 %<br>(99.56%- 99.99%) | 28                   | 312                   | 1547                 | 1                     |

|                  |                   |                  |                |          |    |     |      |   |
|------------------|-------------------|------------------|----------------|----------|----|-----|------|---|
| IVS-II-654 (C>T) | 100.00%           | 82.60 %          | 4.12%          | 100.00 % | 14 | 326 | 1548 | 0 |
|                  | (76.84%- 100.00%) | (80.81%- 84.29%) | (3.75%- 4.53%) |          |    |     |      |   |
| -28 (A>G)        | 100.00%           | 82.30 %          | 2.06%          | 100.00 % | 7  | 333 | 1548 | 0 |
|                  | (59.04%- 100.00%) | (80.50%- 84.00%) | (1.87%- 2.26%) |          |    |     |      |   |
| Codon 17 (A>T)   | 100.00%           | 82.34 %          | 2.35%          | 100.00 % | 8  | 332 | 1548 | 0 |
|                  | (63.06%- 100.00%) | (80.54%- 84.04%) | (2.14%- 2.59%) |          |    |     |      |   |

**Table S6. Sensitivity and specificity of HbA2 for thalassemia carriers screened by NGS**

| <b>HbA2</b>                       | <b>Sensitivity</b><br><b>(%95 CI)</b> | <b>Specificity</b><br><b>(%95 CI)</b> | <b>PPV</b><br><b>(%95 CI)</b> | <b>NPV</b><br><b>(%95 CI)</b> | <b>True</b><br><b>positive</b> | <b>False</b><br><b>positive</b> | <b>True</b><br><b>negative</b> | <b>False</b><br><b>negative</b> |
|-----------------------------------|---------------------------------------|---------------------------------------|-------------------------------|-------------------------------|--------------------------------|---------------------------------|--------------------------------|---------------------------------|
| $\alpha$ -thalassemia             | 65.12%<br>(57.49%- 72.21%)            | 77.04 %<br>(72.63% -81.05%)           | 54.63%<br>(49.42%- 59.75%)    | 83.87 %<br>(80.81%-86.53%)    | 112                            | 93                              | 312                            | 60                              |
| $\alpha$ $\alpha$ /--SEA          | 86.81%<br>(78.10% -93.00%)            | 74.07 %<br>(69.94%- 77.92%)           | 38.54%<br>(34.59%- 42.64%)    | 96.77 %<br>(94.64%-98.08%)    | 79                             | 126                             | 360                            | 12                              |
| $\alpha$ $\alpha$ /- $\alpha$ 3.7 | 39.47%<br>(24.04%-56.61%)             | 64.75 %<br>(60.55%- 68.79%)           | 7.32%<br>(4.98%-10.63%)       | 93.82 %<br>(92.10%-95.18%)    | 15                             | 190                             | 349                            | 23                              |
| $\alpha$ $\alpha$ /- $\alpha$ 4.2 | 37.50%<br>(15.20%-64.57%)             | 64.53 %<br>(60.41%- 68.49%)           | 2.93%<br>(1.56%-5.42%)        | 97.31 %<br>(96.10%-98.15%)    | 6                              | 199                             | 362                            | 10                              |
| $\beta$ -thalassemia              | 95.65%<br>(87.82%- 99.09%)            | 99.61%<br>(98.59%-99.95%)             | 97.06%<br>(89.21%-99.25%)     | 99.41 %<br>(98.24%-99.80%)    | 66                             | 2                               | 506                            | 3                               |
| Codons 41/42 (-TTCT)              | 96.55%<br>(82.24%-99.91%)             | 92.7 %<br>(90.19%-94.73%)             | 41.18%<br>(34.01%-48.74%)     | 99.80%<br>(98.67%- 99.97%)    | 28                             | 40                              | 508                            | 1                               |

|                  |                   |                 |                 |          |    |    |     |   |
|------------------|-------------------|-----------------|-----------------|----------|----|----|-----|---|
| IVS-II-654 (C>T) | 100.00%           | 90.41 %         | 20.59%          | 100.00 % | 14 | 54 | 509 | 0 |
|                  | (76.84%- 100.00%) | (87.67%-92.71%) | (16.75%-25.04%) |          |    |    |     |   |
| -28 (A>G)        | 100.00%           | 89.3 %          | 10.29%          | 100.00 % | 7  | 61 | 509 | 0 |
|                  | (59.04%- 100.00%) | (86.47%-91.71%) | (8.30%-12.70%)  |          |    |    |     |   |
| Codon 17 (A>T)   | 100.00%           | 89.46 %         | 11.76%          | 100.00 % | 8  | 60 | 509 | 0 |
|                  | (63.06%- 100.00%) | (86.64%-91.86%) | (9.50%-14.48%)  |          |    |    |     |   |
